# Supplementary material for: L-Lactate Regulates the Expression of Synaptic Plasticity and Neuroprotection Genes in Cortical Neurons: A Transcriptome Analysis
Source: Front Mol Neurosci. 2018 Oct 10;11:375. doi: 10.3389/fnmol.2018.00375 (PMC6191511; doi:10.3389/fnmol.2018.00375)
Supplement: Supplementary file 1 [file Table_1.XLSX]

## Sheet: Legend
This supplementary file includes the list of genes differentially expressed in response to L-lactate treatment (Lac) for 1h, with their raw expression values (fpkm) and fold change calculation
Two lists are provided, one with genes under the cutoff of adjusted p-value q=0.1 and another with genes below q=0.05

## Sheet: q<0.05
	Experiment 1								Experiment 2								Experiment 3
gene symbol	Condition_1	Condition_2	fpkm_1	fpkm_2	log2_fold_change	test_stat(The value of the test statistic used to compute significance of the observed change in FPKM)	q_value	fold_change	Condition_1	Condition_2	fpkm_1	fpkm_2	log2_fold_change	test_stat	q_value	fold_change	Condition_1	Condition_2	fpkm_1	fpkm_2	log2_fold_change	test_stat	q_value	fold_change	log2_fold_change_average
Ankrd63	Ctr	Lac	1.3482	0.63617	-1.0836	-4.857	0.0016016	0.471847	Ctr	Lac	2.195	1.263	-0.79727	-5.02	0.0037908	0.575435	Ctr	Lac	1.17848	0.690526	-0.771156	-3.49594	0.0035785	0.585948	-0.884009
Apold1	Ctr	Lac	0.94498	2.2254	1.2357	5.7607	0.0016016	2.355	Ctr	Lac	0.99925	1.7226	0.78571	3.9873	0.0037908	1.72395	Ctr	Lac	1.68887	2.81739	0.738296	3.84673	0.0035785	1.6682	0.919902
Arc	Ctr	Lac	10.608	21.583	1.0247	6.2796	0.0016016	2.03463	Ctr	Lac	13.7	26.43	0.94004	6.2938	0.0037908	1.91858	Ctr	Lac	7.54907	12.2268	0.69568	4.47746	0.0035785	1.61965	0.886807
Arl5b	Ctr	Lac	2.7973	7.6096	1.4437	8.4536	0.0016016	2.72027	Ctr	Lac	5.0702	7.9874	0.6556	4.245	0.0037908	1.57536	Ctr	Lac	7.70563	10.6322	0.464449	3.05449	0.0035785	1.37979	0.854583
Arrdc3	Ctr	Lac	21.244	10.979	-0.95224	-5.987	0.0016016	0.516829	Ctr	Lac	25.989	12.533	-1.052	-7.0666	0.0037908	0.482272	Ctr	Lac	31.3528	15.187	-1.04575	-6.87689	0.0035785	0.484393	-1.01666
Atf3	Ctr	Lac	0.4189	4.5405	3.4381	10.525	0.0016016	10.8391	Ctr	Lac	0.40294	1.1659	1.532	4.8031	0.0037908	2.89367	Ctr	Lac	0.54472	1.02103	0.906439	2.71463	0.0035785	1.87441	1.95885
Atf4	Ctr	Lac	176.6	253.59	0.5218	3.3936	0.0016016	1.43575	Ctr	Lac	142.4	192.54	0.4351	2.99	0.0037908	1.35207	Ctr	Lac	139.315	173.851	0.319504	2.15395	0.0035785	1.2479	0.425468
Bdnf	Ctr	Lac	9.6649	26.96	1.48	9.2286	0.0016016	2.78955	Ctr	Lac	11.811	18.389	0.63869	4.2359	0.0037908	1.55692	Ctr	Lac	7.39262	12.1582	0.717775	4.63255	0.0035785	1.64464	0.945488
Btg2	Ctr	Lac	7.3577	15.909	1.1125	6.8838	0.0016016	2.16232	Ctr	Lac	9.1569	14.628	0.67583	4.413	0.0037908	1.59752	Ctr	Lac	10.1729	12.9411	0.34723	2.30945	0.0035785	1.27212	0.711853
Ccdc166	Ctr	Lac	4.7604	3.0122	-0.66023	-3.6069	0.0016016	0.632775	Ctr	Lac	4.3549	2.983	-0.54559	-3.5305	0.0037908	0.685109	Ctr	Lac	3.94971	2.71275	-0.541992	-2.87864	0.0035785	0.686822	-0.582604
Csrnp1	Ctr	Lac	1.255	4.7434	1.917	9.5597	0.0016016	3.77846	Ctr	Lac	1.3115	3.0583	1.2214	6.9382	0.0037908	2.33183	Ctr	Lac	1.08226	1.95481	0.852979	3.88338	0.0035785	1.80623	1.33046
Dusp4	Ctr	Lac	17.859	28.097	0.65375	4.03	0.0016016	1.57325	Ctr	Lac	15.107	20.197	0.41894	2.733	0.0037908	1.33695	Ctr	Lac	14.2744	19.0953	0.419789	2.73124	0.0035785	1.33773	0.497493
Dusp6	Ctr	Lac	15.788	28.659	0.8601	5.3573	0.0016016	1.81521	Ctr	Lac	18.675	31.432	0.7511	5.0085	0.0037908	1.68308	Ctr	Lac	19.2982	25.9701	0.428382	2.78085	0.0035785	1.34572	0.679861
Egr1	Ctr	Lac	44.856	96.98	1.1124	7.2273	0.0016016	2.16211	Ctr	Lac	44.838	84.202	0.90912	6.2289	0.0037908	1.87791	Ctr	Lac	30.9392	57.8852	0.903756	6.03117	0.0035785	1.87093	0.975092
Egr2	Ctr	Lac	5.1812	13.924	1.4262	8.7135	0.0016016	2.68747	Ctr	Lac	6.2593	14.5	1.2128	8.0677	0.0037908	2.31797	Ctr	Lac	3.34366	10.1937	1.60818	9.68285	0.0035785	3.04867	1.41573
Egr3	Ctr	Lac	46.361	65.199	0.49193	3.2121	0.0016016	1.40633	Ctr	Lac	50.5	75.188	0.5742	3.935	0.0037908	1.48886	Ctr	Lac	34.8324	54.8894	0.656095	4.38617	0.0035785	1.57581	0.574075
Egr4	Ctr	Lac	26.007	91.6	1.8164	11.212	0.0016016	3.52216	Ctr	Lac	17.296	50.168	1.5362	10.288	0.0037908	2.90048	Ctr	Lac	10.2652	21.945	1.09613	6.64785	0.0035785	2.1378	1.48291
Erf	Ctr	Lac	15.796	34.182	1.1136	7.1745	0.0016016	2.16395	Ctr	Lac	15.374	23.641	0.62081	4.2822	0.0037908	1.53774	Ctr	Lac	12.6733	19.6275	0.631092	4.21638	0.0035785	1.54874	0.788501
Fbxo33	Ctr	Lac	5.3069	11.657	1.1352	6.8717	0.0016016	2.19661	Ctr	Lac	5.795	9.6285	0.73239	4.7615	0.0037908	1.66139	Ctr	Lac	6.04227	8.45696	0.48505	3.05622	0.0035785	1.39963	0.784213
Fos	Ctr	Lac	10.155	100.32	3.3043	20.776	0.0016016	9.8789	Ctr	Lac	8.2091	39.122	2.2526	14.954	0.0037908	4.76571	Ctr	Lac	8.95213	28.7068	1.68109	10.6562	0.0035785	3.2067	2.41266
Fosb	Ctr	Lac	1.16	53.432	5.5254	29.03	0.0016016	46.0609	Ctr	Lac	1.0553	18.92	4.1642	23.807	0.0037908	17.9292	Ctr	Lac	0.774346	9.88149	3.67368	17.5203	0.0035785	12.7611	4.45443
Fosl2	Ctr	Lac	12.228	52.673	2.1068	13.59	0.0016016	4.3075	Ctr	Lac	13.641	24.681	0.85537	5.811	0.0037908	1.80923	Ctr	Lac	14.1534	22.2922	0.655394	4.37137	0.0035785	1.57505	1.20585
Gadd45b	Ctr	Lac	7.0688	34.49	2.2867	13.101	0.0016016	4.87956	Ctr	Lac	7.7288	12.651	0.71094	4.622	0.0037908	1.63688	Ctr	Lac	4.02535	6.74819	0.745386	3.73918	0.0035785	1.67642	1.24768
Gadd45g	Ctr	Lac	35.004	88.195	1.3331	8.1169	0.0016016	2.51957	Ctr	Lac	32.957	46.02	0.48169	3.0942	0.0037908	1.39639	Ctr	Lac	21.2907	28.6553	0.428575	2.65932	0.0035785	1.3459	0.747788
Gm13889	Ctr	Lac	64.822	98.932	0.60995	3.802	0.0016016	1.52621	Ctr	Lac	52.523	69.023	0.3941	2.6145	0.0037908	1.31414	Ctr	Lac	37.7813	49.6073	0.392879	2.57215	0.0035785	1.31301	0.465643
Gpr19	Ctr	Lac	20.937	38.16	0.86602	5.2355	0.0016016	1.82263	Ctr	Lac	21.915	30.03	0.45449	2.9583	0.0037908	1.3703	Ctr	Lac	19.0162	24.5826	0.370412	2.44052	0.0035785	1.29272	0.563641
Gpr3	Ctr	Lac	1.9901	6.0434	1.6024	8.1504	0.0016016	3.03663	Ctr	Lac	2.077	4.3851	1.078	6.1017	0.0037908	2.11122	Ctr	Lac	1.14754	2.58719	1.17284	4.63982	0.0035785	2.25455	1.28441
Grasp	Ctr	Lac	12.139	29.127	1.262	6.9785	0.0016016	2.39944	Ctr	Lac	10.362	14.859	0.51996	3.127	0.0037908	1.43392	Ctr	Lac	5.0092	7.87277	0.652291	3.41411	0.0035785	1.57166	0.811417
Ier2	Ctr	Lac	10.377	32.519	1.6478	9.7713	0.0016016	3.13373	Ctr	Lac	8.0639	17.85	1.147	7.7978	0.0037908	2.21454	Ctr	Lac	8.95024	16.0891	0.846084	4.90274	0.0035785	1.79761	1.21363
Itpkc	Ctr	Lac	3.6849	5.9711	0.69636	4.194	0.0016016	1.62042	Ctr	Lac	3.466	4.7416	0.45207	2.9242	0.0037908	1.368	Ctr	Lac	3.33127	4.59332	0.463467	2.73118	0.0035785	1.37885	0.537299
Itprip	Ctr	Lac	1.8076	5.289	1.5489	8.9473	0.0016016	2.926	Ctr	Lac	1.6832	2.6596	0.66	4.2318	0.0037908	1.58009	Ctr	Lac	1.6447	2.3681	0.525908	2.85757	0.0035785	1.43984	0.911603
Jrk	Ctr	Lac	2.2394	1.3483	-0.73193	-4.309	0.0016016	0.602095	Ctr	Lac	2.6172	1.8224	-0.52211	-3.3774	0.0037908	0.696351	Ctr	Lac	2.31617	1.69037	-0.454403	-2.56522	0.0035785	0.729812	-0.569481
Junb	Ctr	Lac	27.753	156.71	2.497	15.65	0.0016016	5.64667	Ctr	Lac	26.708	88.113	1.722	11.595	0.0037908	3.29914	Ctr	Lac	15.9885	44.3128	1.47069	9.58254	0.0035785	2.77154	1.89656
Kcnj2	Ctr	Lac	1.0094	1.6569	0.71495	3.8772	0.0016016	1.64143	Ctr	Lac	1.107	2.1387	0.94907	5.9203	0.0037908	1.93063	Ctr	Lac	2.3179	3.21335	0.47126	2.78026	0.0035785	1.38632	0.71176
Kdm6b	Ctr	Lac	8.2951	12.792	0.62497	3.9429	0.0016016	1.54219	Ctr	Lac	6.4406	8.467	0.39465	2.6585	0.0037908	1.31463	Ctr	Lac	8.27219	10.8392	0.389915	2.58195	0.0035785	1.31032	0.469845
Maff	Ctr	Lac	1.7309	10.498	2.6005	12.257	0.0016016	6.06522	Ctr	Lac	1.455	3.0751	1.0796	5.1714	0.0037908	2.11349	Ctr	Lac	2.0844	3.10702	0.575896	2.70062	0.0035785	1.4906	1.41867
Map10	Ctr	Lac	1.7927	0.80571	-1.1538	-5.3195	0.0016016	0.449431	Ctr	Lac	1.9061	1.1091	-0.78117	-4.381	0.0037908	0.581892	Ctr	Lac	2.31968	1.42641	-0.701535	-3.67343	0.0035785	0.614918	-0.878835
Map3k11	Ctr	Lac	3.0395	4.6147	0.60236	3.5979	0.0016016	1.51821	Ctr	Lac	3.045	4.0617	0.41564	2.7132	0.0037908	1.33389	Ctr	Lac	2.69497	3.65719	0.440467	2.57267	0.0035785	1.35704	0.486156
Mir22hg	Ctr	Lac	11.768	19.39	0.7204	4.376	0.0016016	1.64764	Ctr	Lac	17.313	23.357	0.432	2.7873	0.0037908	1.34911	Ctr	Lac	10.2936	13.3722	0.377485	2.34197	0.0035785	1.29908	0.509962
Nfil3	Ctr	Lac	11.657	45.48	1.9642	12.342	0.0016016	3.90218	Ctr	Lac	6.8463	14.603	1.0929	6.9761	0.0037908	2.13304	Ctr	Lac	9.42022	16.8954	0.842802	5.43084	0.0035785	1.79353	1.29997
Npas4	Ctr	Lac	7.0205	36.237	2.3678	14.658	0.0016016	5.16164	Ctr	Lac	5.4638	18.791	1.7821	12.023	0.0037908	3.43931	Ctr	Lac	3.99633	11.1624	1.4819	9.27662	0.0035785	2.79316	1.87727
Nr4a1	Ctr	Lac	14.636	118.99	3.0232	18.915	0.0016016	8.12986	Ctr	Lac	11.24	59.265	2.3984	15.897	0.0037908	5.27229	Ctr	Lac	9.6508	34.6786	1.84532	12.0509	0.0035785	3.59333	2.42231
Nr4a2	Ctr	Lac	2.7259	28.448	3.3835	20.278	0.0016016	10.4362	Ctr	Lac	2.8235	6.9919	1.3081	8.8862	0.0037908	2.47627	Ctr	Lac	2.73854	5.6059	1.03354	5.94383	0.0035785	2.04704	1.90838
Nr4a3	Ctr	Lac	19.914	78.135	1.9721	12.76	0.0016016	3.92352	Ctr	Lac	21.21	37.888	0.83638	5.6959	0.0037908	1.78558	Ctr	Lac	24.2531	39.0548	0.687329	4.60975	0.0035785	1.6103	1.16527
Pcf11	Ctr	Lac	5.4361	8.3737	0.62328	3.8374	0.0016016	1.54038	Ctr	Lac	6.2885	8.4576	0.42751	2.8391	0.0037908	1.34492	Ctr	Lac	6.77634	8.77538	0.372955	2.42166	0.0035785	1.295	0.474582
Pcsk1	Ctr	Lac	3.9837	11.406	1.5177	9.0487	0.0016016	2.86336	Ctr	Lac	5.5493	7.305	0.39656	2.6108	0.0037908	1.31637	Ctr	Lac	4.91445	7.1181	0.534462	3.24302	0.0035785	1.4484	0.816241
Peg10	Ctr	Lac	5.3951	12.36	1.1959	7.4241	0.0016016	2.291	Ctr	Lac	7.84	10.473	0.41769	2.7892	0.0037908	1.3358	Ctr	Lac	8.17947	10.3473	0.339172	2.22093	0.0035785	1.26503	0.650921
Per1	Ctr	Lac	10.1	30.932	1.614	10.27	0.0016016	3.06248	Ctr	Lac	8.8321	18.376	1.057	7.1912	0.0037908	2.08064	Ctr	Lac	7.75651	15.243	0.974672	6.36064	0.0035785	1.96519	1.21522
Phf13	Ctr	Lac	8.064	19.874	1.3012	7.9006	0.0016016	2.46439	Ctr	Lac	7.3457	14.911	1.0214	6.8145	0.0037908	2.02993	Ctr	Lac	7.09963	13.0103	0.873841	5.54041	0.0035785	1.83254	1.06548
Phf23	Ctr	Lac	21.51	32.082	0.57659	3.5568	0.0016016	1.49132	Ctr	Lac	18.993	24.927	0.3922	2.5691	0.0037908	1.31241	Ctr	Lac	19.1413	24.5158	0.357021	2.28769	0.0035785	1.28078	0.441937
Pim3	Ctr	Lac	22.492	44.21	0.97493	6.076	0.0016016	1.96555	Ctr	Lac	18.093	26.44	0.54722	3.5884	0.0037908	1.46127	Ctr	Lac	16.8205	23.5185	0.483581	3.1534	0.0035785	1.39821	0.668577
Rgs4	Ctr	Lac	106.05	202.57	0.9336	6.0714	0.0016016	1.91005	Ctr	Lac	109.6	148.99	0.4429	3.0231	0.0037908	1.35933	Ctr	Lac	98.326	129.712	0.399662	2.6926	0.0035785	1.3192	0.592054
Rpp38	Ctr	Lac	7.71	4.7245	-0.70667	-3.743	0.0016016	0.61273	Ctr	Lac	7.4194	5.4937	-0.43351	-2.598	0.0037908	0.740456	Ctr	Lac	7.14875	5.18781	-0.462566	-2.42978	0.0035785	0.725694	-0.534249
Senp8	Ctr	Lac	2.133	1.1906	-0.8412	-4.3918	0.0016016	0.558177	Ctr	Lac	2.0169	1.5002	-0.42698	-2.5957	0.0037908	0.743813	Ctr	Lac	2.7175	1.8314	-0.569332	-3.03623	0.0035785	0.673929	-0.612504
Sertad3	Ctr	Lac	2.4159	4.8978	1.0195	4.5152	0.0016016	2.02729	Ctr	Lac	1.9645	2.9294	0.57643	2.5593	0.0037908	1.49116	Ctr	Lac	1.45184	2.49122	0.778966	2.81081	0.0035785	1.7159	0.791632
Siah2	Ctr	Lac	13.402	27.803	1.052	6.365	0.0016016	2.07455	Ctr	Lac	10.385	15.558	0.58309	3.8246	0.0037908	1.49806	Ctr	Lac	10.5799	14.3946	0.444209	2.84351	0.0035785	1.36057	0.6931
Sik1	Ctr	Lac	4.7995	13.769	1.5205	9.433	0.0016016	2.86896	Ctr	Lac	4.4548	7.6671	0.78331	5.1902	0.0037908	1.72108	Ctr	Lac	4.73537	8.21046	0.793987	5.19878	0.0035785	1.73386	1.0326
Slc38a2	Ctr	Lac	14.554	23.438	0.68742	4.383	0.0016016	1.6104	Ctr	Lac	15.15	19.45	0.36049	2.4304	0.0037908	1.28387	Ctr	Lac	19.3759	25.4406	0.39287	2.6104	0.0035785	1.313	0.48026
Spry4	Ctr	Lac	5.4964	8.5667	0.64026	3.8474	0.0016016	1.55861	Ctr	Lac	5.3276	8.1582	0.61475	4.001	0.0037908	1.53129	Ctr	Lac	5.47458	7.67553	0.487518	3.21965	0.0035785	1.40203	0.580843
Stk40	Ctr	Lac	11.356	20.645	0.86234	5.3654	0.0016016	1.81799	Ctr	Lac	10.38	14.633	0.4945	3.2849	0.0037908	1.40884	Ctr	Lac	9.5549	13.2388	0.470463	3.10129	0.0035785	1.38555	0.609101
Tob2	Ctr	Lac	5.657	9.4712	0.74333	4.5315	0.0016016	1.67404	Ctr	Lac	4.4929	6.8047	0.59888	3.89	0.0037908	1.51455	Ctr	Lac	4.50673	6.42162	0.510855	3.23176	0.0035785	1.42489	0.617688
Trib1	Ctr	Lac	3.9334	10.161	1.3692	8.4149	0.0016016	2.58338	Ctr	Lac	3.0945	6.9155	1.1601	7.3476	0.0037908	2.23474	Ctr	Lac	3.89533	6.53551	0.746552	4.61762	0.0035785	1.67778	1.09195
Txnip	Ctr	Lac	6.7353	3.2212	-1.0641	-6.2004	0.0016016	0.478258	Ctr	Lac	12.241	5.1165	-1.258	-8.0757	0.0037908	0.417949	Ctr	Lac	9.43529	5.9503	-0.665105	-4.16319	0.0035785	0.630643	-0.995735
Vgf	Ctr	Lac	125.13	199.25	0.67109	4.3866	0.0016016	1.59229	Ctr	Lac	113.39	145.56	0.3603	2.476	0.0037908	1.28373	Ctr	Lac	67.365	85.343	0.341274	2.30123	0.0035785	1.26687	0.457555
Zc3h12c	Ctr	Lac	1.4569	2.4424	0.7454	4.3821	0.0016016	1.67644	Ctr	Lac	2.2076	2.9177	0.40237	2.6176	0.0037908	1.32168	Ctr	Lac	3.15634	4.34756	0.461951	2.95601	0.0035785	1.3774	0.536574
Zdbf2	Ctr	Lac	2.9551	7.671	1.3762	8.642	0.0016016	2.59598	Ctr	Lac	3.4181	4.7279	0.46797	3.1126	0.0037908	1.38317	Ctr	Lac	4.38277	5.64482	0.365086	2.37321	0.0035785	1.28796	0.736419
Zfp113	Ctr	Lac	1.6229	0.97307	-0.73797	-4.2107	0.0016016	0.59958	Ctr	Lac	2.0434	1.2352	-0.7262	-4.731	0.0037908	0.604492	Ctr	Lac	2.68412	1.94761	-0.462749	-2.78457	0.0035785	0.725602	-0.642306
Zfp39	Ctr	Lac	2.068	1.0845	-0.931	-4.976	0.0016016	0.52424	Ctr	Lac	2.4589	1.4145	-0.79773	-4.983	0.0037908	0.575251	Ctr	Lac	2.77807	1.96491	-0.499617	-2.84948	0.0035785	0.707295	-0.742782
Zfp518a	Ctr	Lac	1.6874	0.86258	-0.96807	-5.4994	0.0016016	0.511186	Ctr	Lac	2.3373	1.5271	-0.61403	-4.0847	0.0037908	0.653365	Ctr	Lac	3.13392	2.03484	-0.623056	-3.8095	0.0035785	0.649294	-0.735052
Zfp667	Ctr	Lac	6.1513	10.484	0.76933	4.6535	0.0016016	1.70448	Ctr	Lac	7.276	10.336	0.50635	3.2848	0.0037908	1.42046	Ctr	Lac	5.66588	8.63096	0.607221	3.94646	0.0035785	1.52332	0.627634
Zfp712	Ctr	Lac	1.9001	0.88846	-1.0967	-5.4574	0.0016016	0.467569	Ctr	Lac	2.383	1.497	-0.67089	-4.2794	0.0037908	0.628119	Ctr	Lac	2.65815	1.85493	-0.519054	-2.84722	0.0035785	0.697829	-0.762215
Zfp960	Ctr	Lac	1.4615	0.97385	-0.58573	-2.3012	0.0029566	0.666311	Ctr	Lac	1.883	1.257	-0.58305	-2.6902	0.0037908	0.66755	Ctr	Lac	2.26622	1.63769	-0.468622	-2.41395	0.0035785	0.722655	-0.545801
Zkscan4	Ctr	Lac	2.9438	1.4756	-0.99636	-4.9984	0.0016016	0.501261	Ctr	Lac	2.8231	1.9363	-0.54395	-3.196	0.0037908	0.685889	Ctr	Lac	2.66255	1.86181	-0.516102	-2.67205	0.0035785	0.699259	-0.685471
Bbs10	Ctr	Lac	1.6257	0.82248	-0.98306	-4.102	0.0016016	0.505902	Ctr	Lac	1.7094	1.2521	-0.44914	-2.2896	0.0070138	0.732476	Ctr	Lac	1.87929	1.18812	-0.661507	-3.04249	0.0035785	0.632218	-0.697902
Dusp10	Ctr	Lac	1.9372	3.382	0.80385	4.3264	0.0016016	1.74576	Ctr	Lac	1.9311	2.5744	0.41481	2.4707	0.0070138	1.33313	Ctr	Lac	1.99577	2.77956	0.47791	2.52808	0.0035785	1.39272	0.565523
Lysmd3	Ctr	Lac	1.8435	2.6031	0.4977	2.6692	0.0016016	1.41204	Ctr	Lac	2.7706	3.5072	0.34015	2.2819	0.0070138	1.26589	Ctr	Lac	3.59483	4.91556	0.451432	2.61871	0.0035785	1.3674	0.429761
Med26	Ctr	Lac	4.4849	6.5757	0.55207	3.2887	0.0016016	1.46619	Ctr	Lac	3.7838	4.7137	0.31701	2.0668	0.0070138	1.24575	Ctr	Lac	3.47448	4.61655	0.410017	2.33511	0.0035785	1.3287	0.426366
Plekhh3	Ctr	Lac	4.9402	7.461	0.59486	3.5409	0.0016016	1.51033	Ctr	Lac	4.0656	5.2356	0.36486	2.391	0.0070138	1.28776	Ctr	Lac	3.80003	5.14777	0.437935	2.4718	0.0035785	1.35466	0.465885
Zfp455	Ctr	Lac	1.0511	0.6112	-0.78224	-2.8347	0.0016016	0.58146	Ctr	Lac	1.2006	0.83676	-0.52092	-2.312	0.009953	0.696925	Ctr	Lac	1.5577	1.05064	-0.568149	-2.50413	0.0035785	0.674482	-0.62377
Klf16	Ctr	Lac	20.38	29.908	0.55278	3.493	0.0016016	1.46691	Ctr	Lac	20.83	25.938	0.3162	2.1362	0.015409	1.24506	Ctr	Lac	17.6903	22.4964	0.346732	2.26029	0.0035785	1.27168	0.405237
Zfp472	Ctr	Lac	2.3887	1.8324	-0.38252	-1.9604	0.013302	0.767092	Ctr	Lac	2.7824	2.1706	-0.35821	-2.1109	0.017838	0.78013	Ctr	Lac	3.06987	2.27568	-0.431878	-2.29605	0.0035785	0.741296	-0.390869
Penk	Ctr	Lac	10.971	24.85	1.1799	7.1535	0.0016016	2.2657	Ctr	Lac	15.622	23.641	0.59768	3.9553	0.0037908	1.51328	Ctr	Lac	7.7251	10.2084	0.402134	2.33884	0.00670686	1.32146	0.726571
Zfp189	Ctr	Lac	1.9288	3.0751	0.6729	3.7099	0.0016016	1.59428	Ctr	Lac	2.7034	3.33	0.30086	2.0208	0.028889	1.23188	Ctr	Lac	2.67065	3.53692	0.405301	2.25096	0.00670686	1.32437	0.459687
Plk3	Ctr	Lac	8.8297	13.203	0.58051	3.4485	0.0016016	1.49538	Ctr	Lac	6.7833	9.0634	0.41806	2.7368	0.0037908	1.33613	Ctr	Lac	7.9036	10.1476	0.360558	2.23332	0.00961073	1.28392	0.453043
Mettl21a	Ctr	Lac	3.7596	2.6258	-0.51782	-2.9069	0.0016016	0.698425	Ctr	Lac	3.8743	3.1152	-0.3146	-2.0886	0.012761	0.804068	Ctr	Lac	3.80239	2.85635	-0.412733	-2.20605	0.00961073	0.751199	-0.415051
Zfp507	Ctr	Lac	3.346	1.9838	-0.75448	-4.5859	0.0016016	0.592758	Ctr	Lac	4.4551	3.172	-0.49003	-3.2302	0.0037908	0.712007	Ctr	Lac	4.71261	3.68202	-0.35603	-2.34846	0.0122911	0.781312	-0.533513
Zfp759	Ctr	Lac	2.6247	1.4323	-0.87378	-4.7226	0.0016016	0.545714	Ctr	Lac	2.9188	2.2418	-0.38072	-2.5284	0.0037908	0.768054	Ctr	Lac	3.43543	2.6273	-0.38691	-2.17464	0.0122911	0.764766	-0.547137
Lpin1	Ctr	Lac	3.5432	4.9307	0.47674	2.8489	0.0016016	1.3916	Ctr	Lac	3.8815	4.9411	0.34821	2.2589	0.0070138	1.27298	Ctr	Lac	4.07048	5.19541	0.35204	2.2865	0.0122911	1.27636	0.39233
Frmd6	Ctr	Lac	2.0654	3.7889	0.87536	5.1175	0.0016016	1.83447	Ctr	Lac	2.4008	3.1238	0.3797	2.466	0.0037908	1.30114	Ctr	Lac	2.15643	2.79612	0.374782	2.10963	0.0149609	1.29664	0.543281
Skida1	Ctr	Lac	2.6874	1.9954	-0.42952	-2.4624	0.0016016	0.742507	Ctr	Lac	3.0212	2.2811	-0.4054	-2.6555	0.0037908	0.755026	Ctr	Lac	3.47371	2.69431	-0.366562	-2.09225	0.0149609	0.775629	-0.400494
Sp8	Ctr	Lac	3.5505	5.357	0.59339	3.5744	0.0016016	1.5088	Ctr	Lac	3.7238	4.7989	0.36591	2.333	0.0037908	1.2887	Ctr	Lac	3.97042	5.00499	0.334075	1.97602	0.0149609	1.26057	0.431125
Pard6a	Ctr	Lac	22.743	34.089	0.58385	3.5228	0.0016016	1.49885	Ctr	Lac	17.473	23.144	0.40548	2.6464	0.0037908	1.32453	Ctr	Lac	15.6673	19.814	0.338761	2.1203	0.017432	1.26467	0.442697
Zkscan8	Ctr	Lac	1.891	1.3765	-0.45839	-2.4766	0.0016016	0.727795	Ctr	Lac	2.4948	1.9864	-0.32879	-2.0989	0.0070138	0.7962	Ctr	Lac	3.40133	2.7071	-0.329352	-2.06814	0.017432	0.795894	-0.372177
Dcun1d3	Ctr	Lac	3.3385	4.5523	0.4473	2.704	0.0016016	1.36357	Ctr	Lac	3.4816	4.4611	0.35766	2.3298	0.015409	1.28135	Ctr	Lac	4.35313	5.39873	0.310568	2.0413	0.017432	1.2402	0.371843
Hes5	Ctr	Lac	24.939	34.185	0.45497	2.7378	0.0016016	1.37076	Ctr	Lac	21.652	31.201	0.52712	3.4263	0.0037908	1.44105	Ctr	Lac	22.6401	28.4554	0.32982	2.08283	0.0199387	1.25686	0.437303
Mex3a	Ctr	Lac	6.9378	10.793	0.63755	3.9792	0.0016016	1.55569	Ctr	Lac	6.3406	8.3665	0.39998	2.6406	0.0037908	1.3195	Ctr	Lac	11.1324	13.822	0.312199	2.06393	0.0199387	1.2416	0.44991
Arid5a	Ctr	Lac	1.1981	3.8836	1.6966	9.683	0.0016016	3.24147	Ctr	Lac	1.399	2.1329	0.60781	4.0353	0.0037908	1.52395	Ctr	Lac	1.38962	1.80851	0.380112	2.11537	0.0222729	1.30144	0.894841
Spry2	Ctr	Lac	28.159	41.46	0.558	3.5251	0.0016016	1.47253	Ctr	Lac	28.342	40.986	0.53215	3.5566	0.0037908	1.44609	Ctr	Lac	27.7649	34.5382	0.314934	2.05335	0.0222729	1.24395	0.468361
Mettl7a1	Ctr	Lac	5.3058	3.868	-0.4559	-2.5618	0.0016016	0.729025	Ctr	Lac	4.8261	3.7271	-0.37279	-2.3882	0.0037908	0.772287	Ctr	Lac	5.87686	4.6251	-0.345561	-1.91728	0.0268342	0.787002	-0.391417
Mesdc1	Ctr	Lac	8.265	12.049	0.54384	3.2657	0.0016016	1.45785	Ctr	Lac	5.4418	7.7696	0.51375	3.4085	0.0037908	1.42776	Ctr	Lac	5.98517	7.44637	0.315145	1.95548	0.0290042	1.24414	0.457578
Zfp781	Ctr	Lac	1.533	1.0124	-0.599	-3.069	0.0016016	0.66017	Ctr	Lac	2.0129	1.5749	-0.35398	-2.2902	0.009953	0.782419	Ctr	Lac	2.79209	2.15289	-0.375068	-2.08739	0.0290042	0.771069	-0.442683
Calhm2	Ctr	Lac	1.0203	0.41712	-1.29	-3.252	0.0016016	0.408809	Ctr	Lac	1.4021	0.9141	-0.61714	-2.4288	0.0037908	0.651958	Ctr	Lac	1.07925	0.66119	-0.706898	-2.09447	0.0311608	0.612636	-0.871346
Sertad1	Ctr	Lac	3.8854	11.21	1.528	8.0806	0.0016016	2.88526	Ctr	Lac	4.6613	5.7934	0.31368	1.909	0.042805	1.24288	Ctr	Lac	2.01811	2.90589	0.525971	2.11364	0.0311608	1.4399	0.789217
Bcl2l11	Ctr	Lac	2.8816	1.8238	-0.65991	-3.7671	0.0016016	0.632915	Ctr	Lac	2.908	2.346	-0.31021	-1.9881	0.017838	0.80652	Ctr	Lac	2.95897	2.33556	-0.341325	-1.91316	0.0354435	0.789316	-0.437148
Pars2	Ctr	Lac	5.0156	3.0407	-0.72199	-3.8638	0.0016016	0.606257	Ctr	Lac	4.6137	3.667	-0.33131	-2.0296	0.024826	0.794811	Ctr	Lac	4.11727	3.19776	-0.364626	-1.96818	0.0375983	0.77667	-0.472642
Pvrl2	Ctr	Lac	12.81	20.417	0.67245	3.9946	0.0016016	1.59378	Ctr	Lac	10.292	13.194	0.35833	2.3282	0.0070138	1.28195	Ctr	Lac	10.4336	12.8896	0.304977	1.97709	0.039609	1.2354	0.445252
Gpr75	Ctr	Lac	2.2758	1.6093	-0.49992	-2.573	0.0016016	0.707144	Ctr	Lac	2.813	2.2917	-0.29572	-1.8996	0.038939	0.814663	Ctr	Lac	3.06554	2.37483	-0.368316	-1.97188	0.0416376	0.774686	-0.387985
Zfp791	Ctr	Lac	1.6318	1.1051	-0.56228	-2.3579	0.0029566	0.677229	Ctr	Lac	1.8552	1.272	-0.54402	-2.7067	0.0037908	0.685854	Ctr	Lac	2.07049	1.5629	-0.405741	-1.94616	0.0437035	0.754848	-0.504014
Zfp60	Ctr	Lac	10.667	7.001	-0.60761	-3.69	0.0016016	0.65628	Ctr	Lac	12.613	9.8049	-0.36339	-2.3999	0.0037908	0.777333	Ctr	Lac	15.9047	13.0377	-0.28676	-1.86815	0.045517	0.819741	-0.419253
Nup37	Ctr	Lac	4.8073	3.1824	-0.59509	-2.8543	0.0016016	0.661999	Ctr	Lac	5.2065	4.1178	-0.33845	-1.8873	0.049948	0.790889	Ctr	Lac	5.52716	4.25223	-0.378318	-1.94359	0.045517	0.769334	-0.437286
Kdm7a	Ctr	Lac	1.7503	3.4764	0.98998	5.987	0.0016016	1.98617	Ctr	Lac	1.8868	2.4132	0.35496	2.3833	0.0037908	1.27895	Ctr	Lac	2.26718	2.78178	0.295109	1.89256	0.0490999	1.22698	0.546683
Tefm	Ctr	Lac	5.494	3.5378	-0.63513	-3.216	0.0016016	0.64388	Ctr	Lac	5.939	4.4237	-0.425	-2.4695	0.0037908	0.744835	Ctr	Lac	5.92632	4.64314	-0.352037	-1.83605	0.0490999	0.783477	-0.470722
Zfp273	Ctr	Lac	2.0796	1.4581	-0.51219	-2.375	0.0016016	0.701153	Ctr	Lac	3.1184	2.4991	-0.31938	-1.9237	0.049948	0.80141	Ctr	Lac	3.49597	2.714	-0.365271	-1.91002	0.0490999	0.776323	-0.398947

## Sheet: q<0.1
	Experiment 1								Experiment 2								Experiment 3
gene symbol	Condition_1	Condition_2	fpkm_1	fpkm_2	log2_fold_chang	test_sta	q_valu	fold_change	Condition_1	Condition_2	fpkm_1	fpkm_2	log2_fold_change	test_stat(The value of the test statistic used to compute significance of the observed change in FPKM)	q_value	fold_change	Condition_1	Condition_2	fpkm_1	fpkm_2	log2_fold_change	test_stat	q_value
1190002N15Rik	Ctr	Lac	6.0111	11.748	0.9668	5.9457	0.0016016	1.95451	Ctr	Lac	6.2553	7.832	0.32445	2.1287	0.017838	1.25219	Ctr	Lac	8.13021	9.97999	0.295746	1.95535	0.0509885
Ankrd63	Ctr	Lac	1.3482	0.63617	-1.0836	-4.857	0.0016016	0.471847	Ctr	Lac	2.195	1.263	-0.79727	-5.02	0.0037908	0.575435	Ctr	Lac	1.17848	0.690526	-0.771156	-3.49594	0.0035785
Apold1	Ctr	Lac	0.94498	2.2254	1.2357	5.7607	0.0016016	2.355	Ctr	Lac	0.99925	1.7226	0.78571	3.9873	0.0037908	1.72395	Ctr	Lac	1.68887	2.81739	0.738296	3.84673	0.0035785
Arc	Ctr	Lac	10.608	21.583	1.0247	6.2796	0.0016016	2.03463	Ctr	Lac	13.7	26.43	0.94004	6.2938	0.0037908	1.91858	Ctr	Lac	7.54907	12.2268	0.69568	4.47746	0.0035785
Arid5a	Ctr	Lac	1.1981	3.8836	1.6966	9.683	0.0016016	3.24147	Ctr	Lac	1.399	2.1329	0.60781	4.0353	0.0037908	1.52395	Ctr	Lac	1.38962	1.80851	0.380112	2.11537	0.0222729
Arl5b	Ctr	Lac	2.7973	7.6096	1.4437	8.4536	0.0016016	2.72027	Ctr	Lac	5.0702	7.9874	0.6556	4.245	0.0037908	1.57536	Ctr	Lac	7.70563	10.6322	0.464449	3.05449	0.0035785
Arrdc3	Ctr	Lac	21.244	10.979	-0.95224	-5.987	0.0016016	0.516829	Ctr	Lac	25.989	12.533	-1.052	-7.0666	0.0037908	0.482272	Ctr	Lac	31.3528	15.187	-1.04575	-6.87689	0.0035785
Atf3	Ctr	Lac	0.4189	4.5405	3.4381	10.525	0.0016016	10.8391	Ctr	Lac	0.40294	1.1659	1.532	4.8031	0.0037908	2.89367	Ctr	Lac	0.54472	1.02103	0.906439	2.71463	0.0035785
Atf4	Ctr	Lac	176.6	253.59	0.5218	3.3936	0.0016016	1.43575	Ctr	Lac	142.4	192.54	0.4351	2.99	0.0037908	1.35207	Ctr	Lac	139.315	173.851	0.319504	2.15395	0.0035785
AU041133	Ctr	Lac	3.1443	1.4809	-1.0862	-5.5831	0.0016016	0.470984	Ctr	Lac	4.697	3.4123	-0.46117	-3.054	0.0037908	0.726394	Ctr	Lac	4.71858	3.70828	-0.347604	-1.95113	0.0548097
B3galt4	Ctr	Lac	2.626	1.545	-0.76549	-3.0472	0.0016016	0.588253	Ctr	Lac	2.3772	1.6648	-0.51388	-2.3337	0.0037908	0.700333	Ctr	Lac	1.83089	1.29254	-0.502332	-1.81586	0.0617003
B630005N14Rik	Ctr	Lac	9.515	15.567	0.71024	4.4069	0.0016016	1.63608	Ctr	Lac	10.992	13.22	0.26651	1.7682	0.084885	1.2029	Ctr	Lac	11.0902	14.1865	0.35524	2.33514	0.0035785
Bbs10	Ctr	Lac	1.6257	0.82248	-0.98306	-4.102	0.0016016	0.505902	Ctr	Lac	1.7094	1.2521	-0.44914	-2.2896	0.0070138	0.732476	Ctr	Lac	1.87929	1.18812	-0.661507	-3.04249	0.0035785
Bcl2l11	Ctr	Lac	2.8816	1.8238	-0.65991	-3.7671	0.0016016	0.632915	Ctr	Lac	2.908	2.346	-0.31021	-1.9881	0.017838	0.80652	Ctr	Lac	2.95897	2.33556	-0.341325	-1.91316	0.0354435
Bdnf	Ctr	Lac	9.6649	26.96	1.48	9.2286	0.0016016	2.78955	Ctr	Lac	11.811	18.389	0.63869	4.2359	0.0037908	1.55692	Ctr	Lac	7.39262	12.1582	0.717775	4.63255	0.0035785
Btg2	Ctr	Lac	7.3577	15.909	1.1125	6.8838	0.0016016	2.16232	Ctr	Lac	9.1569	14.628	0.67583	4.413	0.0037908	1.59752	Ctr	Lac	10.1729	12.9411	0.34723	2.30945	0.0035785
Calhm2	Ctr	Lac	1.0203	0.41712	-1.29	-3.252	0.0016016	0.408809	Ctr	Lac	1.4021	0.9141	-0.61714	-2.4288	0.0037908	0.651958	Ctr	Lac	1.07925	0.66119	-0.706898	-2.09447	0.0311608
Ccdc166	Ctr	Lac	4.7604	3.0122	-0.66023	-3.6069	0.0016016	0.632775	Ctr	Lac	4.3549	2.983	-0.54559	-3.5305	0.0037908	0.685109	Ctr	Lac	3.94971	2.71275	-0.541992	-2.87864	0.0035785
Csrnp1	Ctr	Lac	1.255	4.7434	1.917	9.5597	0.0016016	3.77846	Ctr	Lac	1.3115	3.0583	1.2214	6.9382	0.0037908	2.33183	Ctr	Lac	1.08226	1.95481	0.852979	3.88338	0.0035785
Dcun1d3	Ctr	Lac	3.3385	4.5523	0.4473	2.704	0.0016016	1.36357	Ctr	Lac	3.4816	4.4611	0.35766	2.3298	0.015409	1.28135	Ctr	Lac	4.35313	5.39873	0.310568	2.0413	0.017432
Dio2	Ctr	Lac	4.4512	7.7069	0.79193	4.804	0.0016016	1.73139	Ctr	Lac	17.407	20.973	0.2688	1.8294	0.061515	1.20486	Ctr	Lac	5.98639	7.87474	0.395548	2.5241	0.0035785
Dusp10	Ctr	Lac	1.9372	3.382	0.80385	4.3264	0.0016016	1.74576	Ctr	Lac	1.9311	2.5744	0.41481	2.4707	0.0070138	1.33313	Ctr	Lac	1.99577	2.77956	0.47791	2.52808	0.0035785
Dusp14	Ctr	Lac	16.796	32.577	0.95573	5.87	0.0016016	1.93957	Ctr	Lac	16.054	21.82	0.44298	2.9196	0.0037908	1.35942	Ctr	Lac	11.0416	13.5598	0.296386	1.80024	0.0867543
Dusp4	Ctr	Lac	17.859	28.097	0.65375	4.03	0.0016016	1.57325	Ctr	Lac	15.107	20.197	0.41894	2.733	0.0037908	1.33695	Ctr	Lac	14.2744	19.0953	0.419789	2.73124	0.0035785
Dusp6	Ctr	Lac	15.788	28.659	0.8601	5.3573	0.0016016	1.81521	Ctr	Lac	18.675	31.432	0.7511	5.0085	0.0037908	1.68308	Ctr	Lac	19.2982	25.9701	0.428382	2.78085	0.0035785
Egr1	Ctr	Lac	44.856	96.98	1.1124	7.2273	0.0016016	2.16211	Ctr	Lac	44.838	84.202	0.90912	6.2289	0.0037908	1.87791	Ctr	Lac	30.9392	57.8852	0.903756	6.03117	0.0035785
Egr2	Ctr	Lac	5.1812	13.924	1.4262	8.7135	0.0016016	2.68747	Ctr	Lac	6.2593	14.5	1.2128	8.0677	0.0037908	2.31797	Ctr	Lac	3.34366	10.1937	1.60818	9.68285	0.0035785
Egr3	Ctr	Lac	46.361	65.199	0.49193	3.2121	0.0016016	1.40633	Ctr	Lac	50.5	75.188	0.5742	3.935	0.0037908	1.48886	Ctr	Lac	34.8324	54.8894	0.656095	4.38617	0.0035785
Egr4	Ctr	Lac	26.007	91.6	1.8164	11.212	0.0016016	3.52216	Ctr	Lac	17.296	50.168	1.5362	10.288	0.0037908	2.90048	Ctr	Lac	10.2652	21.945	1.09613	6.64785	0.0035785
Erf	Ctr	Lac	15.796	34.182	1.1136	7.1745	0.0016016	2.16395	Ctr	Lac	15.374	23.641	0.62081	4.2822	0.0037908	1.53774	Ctr	Lac	12.6733	19.6275	0.631092	4.21638	0.0035785
Fbxo33	Ctr	Lac	5.3069	11.657	1.1352	6.8717	0.0016016	2.19661	Ctr	Lac	5.795	9.6285	0.73239	4.7615	0.0037908	1.66139	Ctr	Lac	6.04227	8.45696	0.48505	3.05622	0.0035785
Fos	Ctr	Lac	10.155	100.32	3.3043	20.776	0.0016016	9.8789	Ctr	Lac	8.2091	39.122	2.2526	14.954	0.0037908	4.76571	Ctr	Lac	8.95213	28.7068	1.68109	10.6562	0.0035785
Fosb	Ctr	Lac	1.16	53.432	5.5254	29.03	0.0016016	46.0609	Ctr	Lac	1.0553	18.92	4.1642	23.807	0.0037908	17.9292	Ctr	Lac	0.774346	9.88149	3.67368	17.5203	0.0035785
Fosl2	Ctr	Lac	12.228	52.673	2.1068	13.59	0.0016016	4.3075	Ctr	Lac	13.641	24.681	0.85537	5.811	0.0037908	1.80923	Ctr	Lac	14.1534	22.2922	0.655394	4.37137	0.0035785
Frmd6	Ctr	Lac	2.0654	3.7889	0.87536	5.1175	0.0016016	1.83447	Ctr	Lac	2.4008	3.1238	0.3797	2.466	0.0037908	1.30114	Ctr	Lac	2.15643	2.79612	0.374782	2.10963	0.0149609
Gadd45b	Ctr	Lac	7.0688	34.49	2.2867	13.101	0.0016016	4.87956	Ctr	Lac	7.7288	12.651	0.71094	4.622	0.0037908	1.63688	Ctr	Lac	4.02535	6.74819	0.745386	3.73918	0.0035785
Gadd45g	Ctr	Lac	35.004	88.195	1.3331	8.1169	0.0016016	2.51957	Ctr	Lac	32.957	46.02	0.48169	3.0942	0.0037908	1.39639	Ctr	Lac	21.2907	28.6553	0.428575	2.65932	0.0035785
Gla	Ctr	Lac	4.7243	9.0123	0.93177	5.6311	0.0016016	1.90762	Ctr	Lac	4.4504	5.9952	0.42987	2.7897	0.0037908	1.34712	Ctr	Lac	4.56808	5.63946	0.303968	1.83584	0.0668532
Gm13889	Ctr	Lac	64.822	98.932	0.60995	3.802	0.0016016	1.52621	Ctr	Lac	52.523	69.023	0.3941	2.6145	0.0037908	1.31414	Ctr	Lac	37.7813	49.6073	0.392879	2.57215	0.0035785
Gpr19	Ctr	Lac	20.937	38.16	0.86602	5.2355	0.0016016	1.82263	Ctr	Lac	21.915	30.03	0.45449	2.9583	0.0037908	1.3703	Ctr	Lac	19.0162	24.5826	0.370412	2.44052	0.0035785
Gpr3	Ctr	Lac	1.9901	6.0434	1.6024	8.1504	0.0016016	3.03663	Ctr	Lac	2.077	4.3851	1.078	6.1017	0.0037908	2.11122	Ctr	Lac	1.14754	2.58719	1.17284	4.63982	0.0035785
Gpr75	Ctr	Lac	2.2758	1.6093	-0.49992	-2.573	0.0016016	0.707144	Ctr	Lac	2.813	2.2917	-0.29572	-1.8996	0.038939	0.814663	Ctr	Lac	3.06554	2.37483	-0.368316	-1.97188	0.0416376
Grasp	Ctr	Lac	12.139	29.127	1.262	6.9785	0.0016016	2.39944	Ctr	Lac	10.362	14.859	0.51996	3.127	0.0037908	1.43392	Ctr	Lac	5.0092	7.87277	0.652291	3.41411	0.0035785
Hes1	Ctr	Lac	5.151	3.226	-0.67	-3.1138	0.0016016	0.626332	Ctr	Lac	6.0348	4.405	-0.45411	-2.5677	0.0037908	0.729959	Ctr	Lac	5.44998	4.2674	-0.352893	-1.73349	0.0959583
Hes5	Ctr	Lac	24.939	34.185	0.45497	2.7378	0.0016016	1.37076	Ctr	Lac	21.652	31.201	0.52712	3.4263	0.0037908	1.44105	Ctr	Lac	22.6401	28.4554	0.32982	2.08283	0.0199387
Ier2	Ctr	Lac	10.377	32.519	1.6478	9.7713	0.0016016	3.13373	Ctr	Lac	8.0639	17.85	1.147	7.7978	0.0037908	2.21454	Ctr	Lac	8.95024	16.0891	0.846084	4.90274	0.0035785
Itpkc	Ctr	Lac	3.6849	5.9711	0.69636	4.194	0.0016016	1.62042	Ctr	Lac	3.466	4.7416	0.45207	2.9242	0.0037908	1.368	Ctr	Lac	3.33127	4.59332	0.463467	2.73118	0.0035785
Itprip	Ctr	Lac	1.8076	5.289	1.5489	8.9473	0.0016016	2.926	Ctr	Lac	1.6832	2.6596	0.66	4.2318	0.0037908	1.58009	Ctr	Lac	1.6447	2.3681	0.525908	2.85757	0.0035785
Jrk	Ctr	Lac	2.2394	1.3483	-0.73193	-4.309	0.0016016	0.602095	Ctr	Lac	2.6172	1.8224	-0.52211	-3.3774	0.0037908	0.696351	Ctr	Lac	2.31617	1.69037	-0.454403	-2.56522	0.0035785
Junb	Ctr	Lac	27.753	156.71	2.497	15.65	0.0016016	5.64667	Ctr	Lac	26.708	88.113	1.722	11.595	0.0037908	3.29914	Ctr	Lac	15.9885	44.3128	1.47069	9.58254	0.0035785
Kcnj2	Ctr	Lac	1.0094	1.6569	0.71495	3.8772	0.0016016	1.64143	Ctr	Lac	1.107	2.1387	0.94907	5.9203	0.0037908	1.93063	Ctr	Lac	2.3179	3.21335	0.47126	2.78026	0.0035785
Kdm6b	Ctr	Lac	8.2951	12.792	0.62497	3.9429	0.0016016	1.54219	Ctr	Lac	6.4406	8.467	0.39465	2.6585	0.0037908	1.31463	Ctr	Lac	8.27219	10.8392	0.389915	2.58195	0.0035785
Kdm7a	Ctr	Lac	1.7503	3.4764	0.98998	5.987	0.0016016	1.98617	Ctr	Lac	1.8868	2.4132	0.35496	2.3833	0.0037908	1.27895	Ctr	Lac	2.26718	2.78178	0.295109	1.89256	0.0490999
Klf16	Ctr	Lac	20.38	29.908	0.55278	3.493	0.0016016	1.46691	Ctr	Lac	20.83	25.938	0.3162	2.1362	0.015409	1.24506	Ctr	Lac	17.6903	22.4964	0.346732	2.26029	0.0035785
Lpin1	Ctr	Lac	3.5432	4.9307	0.47674	2.8489	0.0016016	1.3916	Ctr	Lac	3.8815	4.9411	0.34821	2.2589	0.0070138	1.27298	Ctr	Lac	4.07048	5.19541	0.35204	2.2865	0.0122911
Lysmd3	Ctr	Lac	1.8435	2.6031	0.4977	2.6692	0.0016016	1.41204	Ctr	Lac	2.7706	3.5072	0.34015	2.2819	0.0070138	1.26589	Ctr	Lac	3.59483	4.91556	0.451432	2.61871	0.0035785
Maff	Ctr	Lac	1.7309	10.498	2.6005	12.257	0.0016016	6.06522	Ctr	Lac	1.455	3.0751	1.0796	5.1714	0.0037908	2.11349	Ctr	Lac	2.0844	3.10702	0.575896	2.70062	0.0035785
Map10	Ctr	Lac	1.7927	0.80571	-1.1538	-5.3195	0.0016016	0.449431	Ctr	Lac	1.9061	1.1091	-0.78117	-4.381	0.0037908	0.581892	Ctr	Lac	2.31968	1.42641	-0.701535	-3.67343	0.0035785
Map3k11	Ctr	Lac	3.0395	4.6147	0.60236	3.5979	0.0016016	1.51821	Ctr	Lac	3.045	4.0617	0.41564	2.7132	0.0037908	1.33389	Ctr	Lac	2.69497	3.65719	0.440467	2.57267	0.0035785
Med26	Ctr	Lac	4.4849	6.5757	0.55207	3.2887	0.0016016	1.46619	Ctr	Lac	3.7838	4.7137	0.31701	2.0668	0.0070138	1.24575	Ctr	Lac	3.47448	4.61655	0.410017	2.33511	0.0035785
Mesdc1	Ctr	Lac	8.265	12.049	0.54384	3.2657	0.0016016	1.45785	Ctr	Lac	5.4418	7.7696	0.51375	3.4085	0.0037908	1.42776	Ctr	Lac	5.98517	7.44637	0.315145	1.95548	0.0290042
Mettl21a	Ctr	Lac	3.7596	2.6258	-0.51782	-2.9069	0.0016016	0.698425	Ctr	Lac	3.8743	3.1152	-0.3146	-2.0886	0.012761	0.804068	Ctr	Lac	3.80239	2.85635	-0.412733	-2.20605	0.00961073
Mettl7a1	Ctr	Lac	5.3058	3.868	-0.4559	-2.5618	0.0016016	0.729025	Ctr	Lac	4.8261	3.7271	-0.37279	-2.3882	0.0037908	0.772287	Ctr	Lac	5.87686	4.6251	-0.345561	-1.91728	0.0268342
Mex3a	Ctr	Lac	6.9378	10.793	0.63755	3.9792	0.0016016	1.55569	Ctr	Lac	6.3406	8.3665	0.39998	2.6406	0.0037908	1.3195	Ctr	Lac	11.1324	13.822	0.312199	2.06393	0.0199387
Mir22hg	Ctr	Lac	11.768	19.39	0.7204	4.376	0.0016016	1.64764	Ctr	Lac	17.313	23.357	0.432	2.7873	0.0037908	1.34911	Ctr	Lac	10.2936	13.3722	0.377485	2.34197	0.0035785
Neat1	Ctr	Lac	2.0276	1.591	-0.34982	-1.8563	0.02226	0.784681	Ctr	Lac	2.1898	1.772	-0.30542	-1.8509	0.063012	0.809202	Ctr	Lac	3.51051	2.70347	-0.37687	-2.06191	0.0149609
Nfil3	Ctr	Lac	11.657	45.48	1.9642	12.342	0.0016016	3.90218	Ctr	Lac	6.8463	14.603	1.0929	6.9761	0.0037908	2.13304	Ctr	Lac	9.42022	16.8954	0.842802	5.43084	0.0035785
Npas4	Ctr	Lac	7.0205	36.237	2.3678	14.658	0.0016016	5.16164	Ctr	Lac	5.4638	18.791	1.7821	12.023	0.0037908	3.43931	Ctr	Lac	3.99633	11.1624	1.4819	9.27662	0.0035785
Nr4a1	Ctr	Lac	14.636	118.99	3.0232	18.915	0.0016016	8.12986	Ctr	Lac	11.24	59.265	2.3984	15.897	0.0037908	5.27229	Ctr	Lac	9.6508	34.6786	1.84532	12.0509	0.0035785
Nr4a2	Ctr	Lac	2.7259	28.448	3.3835	20.278	0.0016016	10.4362	Ctr	Lac	2.8235	6.9919	1.3081	8.8862	0.0037908	2.47627	Ctr	Lac	2.73854	5.6059	1.03354	5.94383	0.0035785
Nr4a3	Ctr	Lac	19.914	78.135	1.9721	12.76	0.0016016	3.92352	Ctr	Lac	21.21	37.888	0.83638	5.6959	0.0037908	1.78558	Ctr	Lac	24.2531	39.0548	0.687329	4.60975	0.0035785
Nup37	Ctr	Lac	4.8073	3.1824	-0.59509	-2.8543	0.0016016	0.661999	Ctr	Lac	5.2065	4.1178	-0.33845	-1.8873	0.049948	0.790889	Ctr	Lac	5.52716	4.25223	-0.378318	-1.94359	0.045517
Pard6a	Ctr	Lac	22.743	34.089	0.58385	3.5228	0.0016016	1.49885	Ctr	Lac	17.473	23.144	0.40548	2.6464	0.0037908	1.32453	Ctr	Lac	15.6673	19.814	0.338761	2.1203	0.017432
Pars2	Ctr	Lac	5.0156	3.0407	-0.72199	-3.8638	0.0016016	0.606257	Ctr	Lac	4.6137	3.667	-0.33131	-2.0296	0.024826	0.794811	Ctr	Lac	4.11727	3.19776	-0.364626	-1.96818	0.0375983
Pcf11	Ctr	Lac	5.4361	8.3737	0.62328	3.8374	0.0016016	1.54038	Ctr	Lac	6.2885	8.4576	0.42751	2.8391	0.0037908	1.34492	Ctr	Lac	6.77634	8.77538	0.372955	2.42166	0.0035785
Pcsk1	Ctr	Lac	3.9837	11.406	1.5177	9.0487	0.0016016	2.86336	Ctr	Lac	5.5493	7.305	0.39656	2.6108	0.0037908	1.31637	Ctr	Lac	4.91445	7.1181	0.534462	3.24302	0.0035785
Peg10	Ctr	Lac	5.3951	12.36	1.1959	7.4241	0.0016016	2.291	Ctr	Lac	7.84	10.473	0.41769	2.7892	0.0037908	1.3358	Ctr	Lac	8.17947	10.3473	0.339172	2.22093	0.0035785
Penk	Ctr	Lac	10.971	24.85	1.1799	7.1535	0.0016016	2.2657	Ctr	Lac	15.622	23.641	0.59768	3.9553	0.0037908	1.51328	Ctr	Lac	7.7251	10.2084	0.402134	2.33884	0.00670686
Per1	Ctr	Lac	10.1	30.932	1.614	10.27	0.0016016	3.06248	Ctr	Lac	8.8321	18.376	1.057	7.1912	0.0037908	2.08064	Ctr	Lac	7.75651	15.243	0.974672	6.36064	0.0035785
Phf13	Ctr	Lac	8.064	19.874	1.3012	7.9006	0.0016016	2.46439	Ctr	Lac	7.3457	14.911	1.0214	6.8145	0.0037908	2.02993	Ctr	Lac	7.09963	13.0103	0.873841	5.54041	0.0035785
Phf23	Ctr	Lac	21.51	32.082	0.57659	3.5568	0.0016016	1.49132	Ctr	Lac	18.993	24.927	0.3922	2.5691	0.0037908	1.31241	Ctr	Lac	19.1413	24.5158	0.357021	2.28769	0.0035785
Pim3	Ctr	Lac	22.492	44.21	0.97493	6.076	0.0016016	1.96555	Ctr	Lac	18.093	26.44	0.54722	3.5884	0.0037908	1.46127	Ctr	Lac	16.8205	23.5185	0.483581	3.1534	0.0035785
Pip5k1a	Ctr	Lac	11.039	15.122	0.45407	2.7912	0.0016016	1.36991	Ctr	Lac	13.22	16.422	0.31292	2.088	0.017838	1.24223	Ctr	Lac	9.79852	11.7463	0.261567	1.72157	0.0896472
Plekhh3	Ctr	Lac	4.9402	7.461	0.59486	3.5409	0.0016016	1.51033	Ctr	Lac	4.0656	5.2356	0.36486	2.391	0.0070138	1.28776	Ctr	Lac	3.80003	5.14777	0.437935	2.4718	0.0035785
Plk3	Ctr	Lac	8.8297	13.203	0.58051	3.4485	0.0016016	1.49538	Ctr	Lac	6.7833	9.0634	0.41806	2.7368	0.0037908	1.33613	Ctr	Lac	7.9036	10.1476	0.360558	2.23332	0.00961073
Pvrl2	Ctr	Lac	12.81	20.417	0.67245	3.9946	0.0016016	1.59378	Ctr	Lac	10.292	13.194	0.35833	2.3282	0.0070138	1.28195	Ctr	Lac	10.4336	12.8896	0.304977	1.97709	0.039609
Rassf1	Ctr	Lac	10.775	19.738	0.87323	5.3027	0.0016016	1.83176	Ctr	Lac	7.9114	9.8953	0.3228	2.0684	0.017838	1.25076	Ctr	Lac	8.31065	10.2476	0.302256	1.80768	0.0650802
Rgs2	Ctr	Lac	33.651	55.88	0.73165	4.7461	0.0016016	1.66055	Ctr	Lac	33.71	45.052	0.4184	2.8517	0.0037908	1.33646	Ctr	Lac	26.3378	31.8002	0.2719	1.80645	0.0564255
Rgs4	Ctr	Lac	106.05	202.57	0.9336	6.0714	0.0016016	1.91005	Ctr	Lac	109.6	148.99	0.4429	3.0231	0.0037908	1.35933	Ctr	Lac	98.326	129.712	0.399662	2.6926	0.0035785
Rpp38	Ctr	Lac	7.71	4.7245	-0.70667	-3.743	0.0016016	0.61273	Ctr	Lac	7.4194	5.4937	-0.43351	-2.598	0.0037908	0.740456	Ctr	Lac	7.14875	5.18781	-0.462566	-2.42978	0.0035785
Senp8	Ctr	Lac	2.133	1.1906	-0.8412	-4.3918	0.0016016	0.558177	Ctr	Lac	2.0169	1.5002	-0.42698	-2.5957	0.0037908	0.743813	Ctr	Lac	2.7175	1.8314	-0.569332	-3.03623	0.0035785
Sertad1	Ctr	Lac	3.8854	11.21	1.528	8.0806	0.0016016	2.88526	Ctr	Lac	4.6613	5.7934	0.31368	1.909	0.042805	1.24288	Ctr	Lac	2.01811	2.90589	0.525971	2.11364	0.0311608
Sertad3	Ctr	Lac	2.4159	4.8978	1.0195	4.5152	0.0016016	2.02729	Ctr	Lac	1.9645	2.9294	0.57643	2.5593	0.0037908	1.49116	Ctr	Lac	1.45184	2.49122	0.778966	2.81081	0.0035785
Siah2	Ctr	Lac	13.402	27.803	1.052	6.365	0.0016016	2.07455	Ctr	Lac	10.385	15.558	0.58309	3.8246	0.0037908	1.49806	Ctr	Lac	10.5799	14.3946	0.444209	2.84351	0.0035785
Sik1	Ctr	Lac	4.7995	13.769	1.5205	9.433	0.0016016	2.86896	Ctr	Lac	4.4548	7.6671	0.78331	5.1902	0.0037908	1.72108	Ctr	Lac	4.73537	8.21046	0.793987	5.19878	0.0035785
Skida1	Ctr	Lac	2.6874	1.9954	-0.42952	-2.4624	0.0016016	0.742507	Ctr	Lac	3.0212	2.2811	-0.4054	-2.6555	0.0037908	0.755026	Ctr	Lac	3.47371	2.69431	-0.366562	-2.09225	0.0149609
Slc16a6	Ctr	Lac	8.649	6.0023	-0.52711	-2.7495	0.0016016	0.693941	Ctr	Lac	10.225	8.1712	-0.3235	-1.9064	0.053425	0.799126	Ctr	Lac	12.0574	8.84601	-0.446818	-2.62939	0.0035785
Slc38a2	Ctr	Lac	14.554	23.438	0.68742	4.383	0.0016016	1.6104	Ctr	Lac	15.15	19.45	0.36049	2.4304	0.0037908	1.28387	Ctr	Lac	19.3759	25.4406	0.39287	2.6104	0.0035785
Smad7	Ctr	Lac	2.4218	3.9904	0.72042	4.2497	0.0016016	1.64767	Ctr	Lac	1.942	2.693	0.4716	3.1022	0.0037908	1.38671	Ctr	Lac	2.26996	2.90835	0.357537	1.93851	0.0509885
Sp8	Ctr	Lac	3.5505	5.357	0.59339	3.5744	0.0016016	1.5088	Ctr	Lac	3.7238	4.7989	0.36591	2.333	0.0037908	1.2887	Ctr	Lac	3.97042	5.00499	0.334075	1.97602	0.0149609
Spry2	Ctr	Lac	28.159	41.46	0.558	3.5251	0.0016016	1.47253	Ctr	Lac	28.342	40.986	0.53215	3.5566	0.0037908	1.44609	Ctr	Lac	27.7649	34.5382	0.314934	2.05335	0.0222729
Spry4	Ctr	Lac	5.4964	8.5667	0.64026	3.8474	0.0016016	1.55861	Ctr	Lac	5.3276	8.1582	0.61475	4.001	0.0037908	1.53129	Ctr	Lac	5.47458	7.67553	0.487518	3.21965	0.0035785
Stk40	Ctr	Lac	11.356	20.645	0.86234	5.3654	0.0016016	1.81799	Ctr	Lac	10.38	14.633	0.4945	3.2849	0.0037908	1.40884	Ctr	Lac	9.5549	13.2388	0.470463	3.10129	0.0035785
Tefm	Ctr	Lac	5.494	3.5378	-0.63513	-3.216	0.0016016	0.64388	Ctr	Lac	5.939	4.4237	-0.425	-2.4695	0.0037908	0.744835	Ctr	Lac	5.92632	4.64314	-0.352037	-1.83605	0.0490999
Tgds	Ctr	Lac	3.0504	1.8697	-0.70616	-3.6727	0.0016016	0.612946	Ctr	Lac	3.0156	2.4321	-0.31024	-1.83	0.077884	0.806506	Ctr	Lac	3.43362	2.69183	-0.351145	-1.88314	0.0528216
Tob2	Ctr	Lac	5.657	9.4712	0.74333	4.5315	0.0016016	1.67404	Ctr	Lac	4.4929	6.8047	0.59888	3.89	0.0037908	1.51455	Ctr	Lac	4.50673	6.42162	0.510855	3.23176	0.0035785
Trib1	Ctr	Lac	3.9334	10.161	1.3692	8.4149	0.0016016	2.58338	Ctr	Lac	3.0945	6.9155	1.1601	7.3476	0.0037908	2.23474	Ctr	Lac	3.89533	6.53551	0.746552	4.61762	0.0035785
Txnip	Ctr	Lac	6.7353	3.2212	-1.0641	-6.2004	0.0016016	0.478258	Ctr	Lac	12.241	5.1165	-1.258	-8.0757	0.0037908	0.417949	Ctr	Lac	9.43529	5.9503	-0.665105	-4.16319	0.0035785
Vgf	Ctr	Lac	125.13	199.25	0.67109	4.3866	0.0016016	1.59229	Ctr	Lac	113.39	145.56	0.3603	2.476	0.0037908	1.28373	Ctr	Lac	67.365	85.343	0.341274	2.30123	0.0035785
Vmac	Ctr	Lac	4.798	3.2369	-0.56801	-3.1932	0.0016016	0.674543	Ctr	Lac	4.682	3.9088	-0.26039	-1.7482	0.0968	0.834858	Ctr	Lac	6.02065	4.47479	-0.4281	-2.43884	0.0035785
Zbtb7a	Ctr	Lac	5.6194	7.2378	0.36513	2.1914	0.0064739	1.288	Ctr	Lac	6.0499	7.2515	0.26136	1.7112	0.084885	1.19861	Ctr	Lac	4.9363	5.92708	0.26389	1.74089	0.0896472
Zc3h12c	Ctr	Lac	1.4569	2.4424	0.7454	4.3821	0.0016016	1.67644	Ctr	Lac	2.2076	2.9177	0.40237	2.6176	0.0037908	1.32168	Ctr	Lac	3.15634	4.34756	0.461951	2.95601	0.0035785
Zc3hav1l	Ctr	Lac	1.1468	0.6369	-0.84847	-4.3814	0.0016016	0.555372	Ctr	Lac	1.2926	0.93086	-0.47368	-2.9193	0.0037908	0.720123	Ctr	Lac	2.16211	1.73812	-0.314908	-1.77674	0.080256
Zdbf2	Ctr	Lac	2.9551	7.671	1.3762	8.642	0.0016016	2.59598	Ctr	Lac	3.4181	4.7279	0.46797	3.1126	0.0037908	1.38317	Ctr	Lac	4.38277	5.64482	0.365086	2.37321	0.0035785
Zfp113	Ctr	Lac	1.6229	0.97307	-0.73797	-4.2107	0.0016016	0.59958	Ctr	Lac	2.0434	1.2352	-0.7262	-4.731	0.0037908	0.604492	Ctr	Lac	2.68412	1.94761	-0.462749	-2.78457	0.0035785
Zfp189	Ctr	Lac	1.9288	3.0751	0.6729	3.7099	0.0016016	1.59428	Ctr	Lac	2.7034	3.33	0.30086	2.0208	0.028889	1.23188	Ctr	Lac	2.67065	3.53692	0.405301	2.25096	0.00670686
Zfp273	Ctr	Lac	2.0796	1.4581	-0.51219	-2.375	0.0016016	0.701153	Ctr	Lac	3.1184	2.4991	-0.31938	-1.9237	0.049948	0.80141	Ctr	Lac	3.49597	2.714	-0.365271	-1.91002	0.0490999
Zfp39	Ctr	Lac	2.068	1.0845	-0.931	-4.976	0.0016016	0.52424	Ctr	Lac	2.4589	1.4145	-0.79773	-4.983	0.0037908	0.575251	Ctr	Lac	2.77807	1.96491	-0.499617	-2.84948	0.0035785
Zfp455	Ctr	Lac	1.0511	0.6112	-0.78224	-2.8347	0.0016016	0.58146	Ctr	Lac	1.2006	0.83676	-0.52092	-2.312	0.009953	0.696925	Ctr	Lac	1.5577	1.05064	-0.568149	-2.50413	0.0035785
Zfp472	Ctr	Lac	2.3887	1.8324	-0.38252	-1.9604	0.013302	0.767092	Ctr	Lac	2.7824	2.1706	-0.35821	-2.1109	0.017838	0.78013	Ctr	Lac	3.06987	2.27568	-0.431878	-2.29605	0.0035785
Zfp507	Ctr	Lac	3.346	1.9838	-0.75448	-4.5859	0.0016016	0.592758	Ctr	Lac	4.4551	3.172	-0.49003	-3.2302	0.0037908	0.712007	Ctr	Lac	4.71261	3.68202	-0.35603	-2.34846	0.0122911
Zfp518a	Ctr	Lac	1.6874	0.86258	-0.96807	-5.4994	0.0016016	0.511186	Ctr	Lac	2.3373	1.5271	-0.61403	-4.0847	0.0037908	0.653365	Ctr	Lac	3.13392	2.03484	-0.623056	-3.8095	0.0035785
Zfp60	Ctr	Lac	10.667	7.001	-0.60761	-3.69	0.0016016	0.65628	Ctr	Lac	12.613	9.8049	-0.36339	-2.3999	0.0037908	0.777333	Ctr	Lac	15.9047	13.0377	-0.28676	-1.86815	0.045517
Zfp667	Ctr	Lac	6.1513	10.484	0.76933	4.6535	0.0016016	1.70448	Ctr	Lac	7.276	10.336	0.50635	3.2848	0.0037908	1.42046	Ctr	Lac	5.66588	8.63096	0.607221	3.94646	0.0035785
Zfp712	Ctr	Lac	1.9001	0.88846	-1.0967	-5.4574	0.0016016	0.467569	Ctr	Lac	2.383	1.497	-0.67089	-4.2794	0.0037908	0.628119	Ctr	Lac	2.65815	1.85493	-0.519054	-2.84722	0.0035785
Zfp759	Ctr	Lac	2.6247	1.4323	-0.87378	-4.7226	0.0016016	0.545714	Ctr	Lac	2.9188	2.2418	-0.38072	-2.5284	0.0037908	0.768054	Ctr	Lac	3.43543	2.6273	-0.38691	-2.17464	0.0122911
Zfp781	Ctr	Lac	1.533	1.0124	-0.599	-3.069	0.0016016	0.66017	Ctr	Lac	2.0129	1.5749	-0.35398	-2.2902	0.009953	0.782419	Ctr	Lac	2.79209	2.15289	-0.375068	-2.08739	0.0290042
Zfp791	Ctr	Lac	1.6318	1.1051	-0.56228	-2.3579	0.0029566	0.677229	Ctr	Lac	1.8552	1.272	-0.54402	-2.7067	0.0037908	0.685854	Ctr	Lac	2.07049	1.5629	-0.405741	-1.94616	0.0437035
Zfp937	Ctr	Lac	1.8044	1.24	-0.54027	-3.191	0.0016016	0.687638	Ctr	Lac	2.5833	2.017	-0.35689	-2.3445	0.009953	0.780841	Ctr	Lac	3.41249	2.79757	-0.286651	-1.83805	0.0753985
Zfp948	Ctr	Lac	8.325	12.02	0.52984	3.1605	0.0016016	1.44378	Ctr	Lac	10.164	12.384	0.28495	1.8544	0.056734	1.21837	Ctr	Lac	9.69197	12.1091	0.321227	2.12736	0.017432
Zfp960	Ctr	Lac	1.4615	0.97385	-0.58573	-2.3012	0.0029566	0.666311	Ctr	Lac	1.883	1.257	-0.58305	-2.6902	0.0037908	0.66755	Ctr	Lac	2.26622	1.63769	-0.468622	-2.41395	0.0035785
Zfp97	Ctr	Lac	1.5087	1.0675	-0.499	-2.2097	0.0053787	0.707592	Ctr	Lac	1.21	0.87767	-0.4633	-2.121	0.012761	0.725321	Ctr	Lac	2.40342	1.89497	-0.34292	-1.84028	0.0598823
Zkscan4	Ctr	Lac	2.9438	1.4756	-0.99636	-4.9984	0.0016016	0.501261	Ctr	Lac	2.8231	1.9363	-0.54395	-3.196	0.0037908	0.685889	Ctr	Lac	2.66255	1.86181	-0.516102	-2.67205	0.0035785
Zkscan8	Ctr	Lac	1.891	1.3765	-0.45839	-2.4766	0.0016016	0.727795	Ctr	Lac	2.4948	1.9864	-0.32879	-2.0989	0.0070138	0.7962	Ctr	Lac	3.40133	2.7071	-0.329352	-2.06814	0.017432
Zswim3	Ctr	Lac	4.2779	2.7849	-0.61926	-3.5291	0.0016016	0.651004	Ctr	Lac	3.4449	2.5216	-0.45014	-2.9422	0.0037908	0.731969	Ctr	Lac	3.16201	2.5019	-0.337818	-1.81773	0.0787018
